# Supplementary material
Source: PubMed Central journal article supplement (PMC5541881)
Supplement: 2016_160788-Disclosures_and_Contributions.pdf [file 2016_160788-Disclosures_and_Contributions.pdf]

Haematologica  
HAEMATOL/2016/160788  
Version 4

NRF2 mediates  $\gamma$ -globin gene regulation and fetal hemoglobin induction  
in human erythroid progenitors

Xingguo Zhu, Biaoru Li, and Betty S. Pace

Disclosures: The authors declare no competing financial interests.

Contributions: XZ designed and performed the research studies, analyzed the data and wrote the manuscript. BL performed flow cytometry studies and assisted with writing and review of the manuscript. BSP contributed to the research design, data analysis, writing the manuscript and supervision of the study.
